# Supplementary material
Source: MDPI journal article supplement (https://www.mdpi.com/1424-2818/15/5/622)

## Supplementary Files

**Table S1:** Nest and collection year of 33 osprey chicks collected from 13 nests located along the western coast of Corsica in the period 2006-2010 (translocation phase). The total number of chicks collected per year and per nest, as well as the total for the entire period (in square brackets) are reported. The asterisk indicates the two individuals who subsequently settled and reproduced in Italy (see main text). The individual ID is represented by the two-digit alphanumeric code of the PVC ring.

| <i>Nest/Year</i>           | <i>2006</i> | <i>2007</i> | <i>2008</i> | <i>2009</i> | <i>2010</i> | <i>Tot per nest</i> |
|----------------------------|-------------|-------------|-------------|-------------|-------------|---------------------|
| <i>Arangaggia</i>          | I1*         |             | S3          |             |             | 2                   |
| <i>Cala vecchia</i>        |             |             |             | S4          |             | 1                   |
| <i>Cavallo_1</i>           | H1          | I2          | B3          | D4          | D5          | 5                   |
| <i>Cavallo_2</i>           |             | A2          | C3          |             |             | 2                   |
| <i>Ciuttone</i>            | C1          | D2          | I3          | A4          | B5          | 5                   |
| <i>Elpa nera</i>           | B1          |             |             |             |             | 1                   |
| <i>Ficaja</i>              |             | C2          | D3          |             |             | 2                   |
| <i>Ficajola</i>            | D1          |             |             |             |             | 1                   |
| <i>Gradelle</i>            | A1          | B2          | H3          | T4          | S5*         | 5                   |
| <i>Orchinu artificiale</i> |             |             |             |             | F5          | 1                   |
| <i>Orchinu naturale</i>    |             |             |             |             | L5          | 1                   |
| <i>Porto</i>               |             |             | A3          | H4          | C5          | 3                   |
| <i>Senino</i>              |             | E2          | E3          | C4          | K5          | 4                   |
| <i>Tot per year</i>        | 6           | 6           | 8           | 6           | 7           | [33]                |

**Table S2.** Multiplex PCR primer sets used in this study.

| MULTIPLEX   | Locus1  | Locus2  | Locus3  |
|-------------|---------|---------|---------|
| MULTIPLEX1  | PHA04   | PHA11   |         |
| MULTIPLEX 2 | PHA13   | PHA29   |         |
| MULTIPLEX 3 | PHA14   | PHA16   | PHA35   |
| MULTIPLEX 4 | PHA28   | PHA27   |         |
| MULTIPLEX 5 | PHA36   | PHA37   |         |
| MULTIPLEX 6 | Balbu18 | Balbu23 | Balbu17 |
| SIMPLEX 7   | Balbu40 |         |         |
| SIMPLEX 8   | Balbu28 |         |         |

**Table S3.** Details on the number of alleles (*Na*), allele richness (*Ar*) and private alleles (*Pa*) in the sampling periods. a) Number of alleles (*Na*), allele richness (*Ar*) in the 16 loci in the two sampling periods. b) Comparison between POP\_1 and POP\_2; private alleles distributed in the translocated (POP\_1) and lacking in the POP\_2 in which no private allele was found; c) Comparison between POP\_1, POP\_2 and the injured osprey (POP\_N); alleles found in the injured osprey (POP\_N) and not found either in POP\_1 or in POP2. The allele 161, which was recorded as a private allele at the PHA4 locus in b) was no more scoring because it was retrieved also in the injured osprey.

a)

| LOCUS   | POP_1     |           | POP_2     |           |
|---------|-----------|-----------|-----------|-----------|
|         | <i>Na</i> | <i>Ar</i> | <i>Na</i> | <i>AR</i> |
| BALBU17 | 3,0       | 3,0       | 3,0       | 3,0       |
| BALBU18 | 2,0       | 2,0       | 2,0       | 2,0       |
| BALBU23 | 3,0       | 3,0       | 2,0       | 2,0       |
| BALBU28 | 2,0       | 2,0       | 1,0       | 1,0       |
| BALBU40 | 2,0       | 2,0       | 2,0       | 2,0       |
| PHA04   | 3,0       | 3,0       | 2,0       | 2,0       |
| PHA11   | 5,0       | 5,0       | 5,0       | 4,7       |
| PHA13   | 7,0       | 7,0       | 6,0       | 6,0       |
| PHA14   | 4,0       | 4,0       | 4,0       | 3,9       |
| PHA16   | 3,0       | 3,0       | 3,0       | 3,0       |
| PHA27   | 5,0       | 5,0       | 5,0       | 4,7       |
| PHA28   | 5,0       | 5,0       | 5,0       | 5,0       |
| PHA29   | 2,0       | 2,0       | 2,0       | 2,0       |
| PHA35   | 2,0       | 2,0       | 1,0       | 1,0       |
| PHA36   | 4,0       | 4,0       | 3,0       | 3,0       |
| PHA37   | 2,0       | 2,0       | 2,0       | 2,0       |

b)

| POP   | Locus   | Allele | Frequency |
|-------|---------|--------|-----------|
| POP_1 | Balbu23 | 211    | 0,031     |
| POP_1 | Balbu28 | 77     | 0,030     |
| POP_1 | PHA04   | 161    | 0,030     |
| POP_1 | PHA13   | 184    | 0,030     |
| POP_1 | PHA36   | 170    | 0,015     |

c)

| POP   | Locus   | Allele | Frequency |
|-------|---------|--------|-----------|
| POP_N | PHA14   | 157    | 0,500     |
| POP_N | PHA14   | 163    | 0,500     |
| POP_N | PHA16   | 297    | 0,500     |
| POP_N | PHA27   | 164    | 0,500     |
| POP_N | PHA35   | 109    | 0,500     |
| POP_N | PHA37   | 84     | 0,500     |
| POP_1 | Balbu23 | 211    | 0,031     |
| POP_1 | Balbu28 | 77     | 0,030     |
| POP_1 | PHA13   | 184    | 0,030     |
| POP_1 | PHA35   | 115    | 0,015     |

**Table S4.** Results from Bottleneck test using both the Infinite Allele Model (IAM) and the Two-Phase Model (TMP). 1 and 2 tail Wilcoxon tests were checked for significance. TMP (a) and (b) refer to different computation parameters: 70% Stepwise Mutation Model (SMM) and 30% TMP in (a) and 0.00% SMM and 35% TMP variance in (b).

| Population | mean_N | mean_k | mean_He | IAM_1t_W        | IAM_2t_W        | TPM_1t_W (a)    | TPM_2t_W (a)    | TPM_1t_W (b)    | TPM_2t_W (b)    |
|------------|--------|--------|---------|-----------------|-----------------|-----------------|-----------------|-----------------|-----------------|
| POP_1      | 65.88  | 3.38   | 0.45086 | 0.028839        | 0.057678        | 0.046722        | 0.093445        | 0.041626        | 0.083252        |
| POP_2      | 97.88  | 3.00   | 0.43713 | <b>0.000092</b> | <b>0.000183</b> | <b>0.000305</b> | <b>0.000610</b> | <b>0.000153</b> | <b>0.000305</b> |

**Table S5.** Family relationships among translocated, adult and newborn individuals. In grey and bold are reported the misassignment of individuals with respect to the knowledge reported in Figure 2. Numbers preceded by an asterisk or by a pound sign identify unsampled ospreys. Identical genotypes in the hypothetical breeding pair share the same number.

| Offspring          | Father                    | Mother                    | Offspring          | Father                    | Mother      |
|--------------------|---------------------------|---------------------------|--------------------|---------------------------|-------------|
| 1-B7-E3270         | 1-I1-L7-E4647             | #1                        | 3-IAM-E1063        | *3                        | 3-IAC-E4741 |
| 1-IAP-E1055        | 1-I1-L7-E4647             | #1                        | 3-IBE-E1058        | *3                        | 3-IAC-E4741 |
| 1-IAT-E1056        | 1-I1-L7-E4647             | #1                        | 3-IBH-E2424        | *3                        | 3-IAC-E4741 |
| 1-IAZ-E1057        | 1-I1-L7-E4647             | #1                        | 3-IBI-E1059        | *3                        | 3-IAC-E4741 |
| 1-IBA-E1066        | 1-I1-L7-E4647             | #1                        | 3-IBK-E2425        | *3                        | 3-IAC-E4741 |
| 1-IAA-E1150        | 1-I1-L7-E4647             | #1                        | 3-IDA-E4745        | *3                        | 3-IAC-E4741 |
| <b>1-IBM-E2427</b> | *1                        | <b>Pha12-translocated</b> | 3-IDB-E4746        | *3                        | 3-IAC-E4741 |
| <b>1-IBS-E2428</b> | *1                        | <b>Pha12-translocated</b> | 3-IFA-E2431        | *3                        | 3-IAC-E4741 |
| 2-A7-E4736         | 2-IAA-E1150               | 2-S5-E1146                | 3-IFB-E2432        | *3                        | 3-IAC-E4741 |
| 2-E4737            | 2-IAA-E1150               | 2-S5-E1146                | 4-IBV-E2429        | *4                        | #4          |
| 2-E4738            | 2-IAA-E1150               | 2-S5-E1146                | 4-ICE-E4742        | *4                        | #4          |
| 2-IAD-E1051        | 2-IAA-E1150               | 2-S5-E1146                | 4-ICI-E4744        | *4                        | #4          |
| 2-IAK-E1060        | 2-IAA-E1150               | 2-S5-E1146                | 4-ICT-E4748        | *4                        | #4          |
| 2-IAS-E1065        | 2-IAA-E1150               | 2-S5-E1146                | 4-ICV-E4743        | *4                        | #4          |
| 2-IAU-E4747        | 2-IAA-E1150               | 2-S5-E1146                | 4-ICZ-E4749        | *4                        | #4          |
| 2-IAV-E1061        | 2-IAA-E1150               | 2-S5-E1146                | 4-IFC-E2434        | *4                        | #4          |
| 2-IBZ-E2426        | 2-IAA-E1150               | 2-S5-E1146                | 4-IFD-E2436        | *4                        | #4          |
| <b>2-IAO-E1064</b> | <b>Pha32-translocated</b> | <b>#3</b>                 | 4-IFF-E2437        | *4                        | #4          |
| 3-E4739            | *3                        | 3-IAC-E4741               | 5-IBB-E4750        | *5                        | 3-IAE-E1053 |
| 3-E4740            | *3                        | 3-IAC-E4741               | 5-IBC-E2421        | *5                        | 3-IAE-E1053 |
| 3-IAB-E1062        | *3                        | 3-IAC-E4741               | 5-IBD-E2422        | *5                        | 3-IAE-E1053 |
| 3-IAE-E1053        | *3                        | 3-IAC-E4741               | 5-IFH-E2438        | *5                        | 3-IAE-E1053 |
| 3-IAH-E1054        | *3                        | 3-IAC-E4741               | <b>5-IFJ-E2439</b> | <b>Pha31-translocated</b> | <b>#5</b>   |

**Figure S1.** Representation of the AMOVA pie graph after comparing POP\_1 and POP\_2. Almost the whole variance (in grey) is within individuals while a 2% of differentiation (in blue) has been recorded between the two populations.

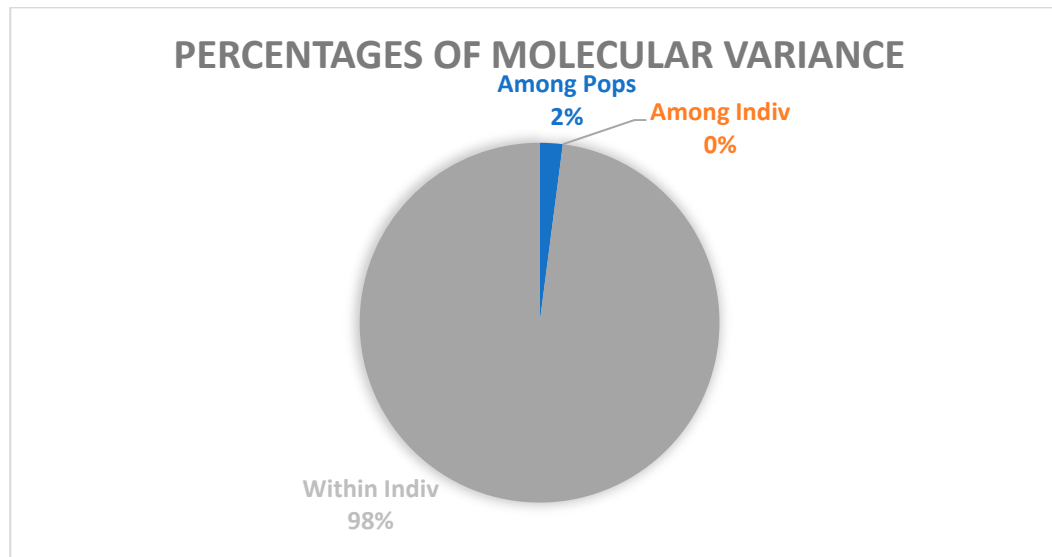

**Figure S2.** The plot of the Factorial Correspondence Analysis (FCA) that was carried out by comparing POP\_1 and POP\_2. The two populations partially overlap although the presence of a slight shift on axes 1 and 2.

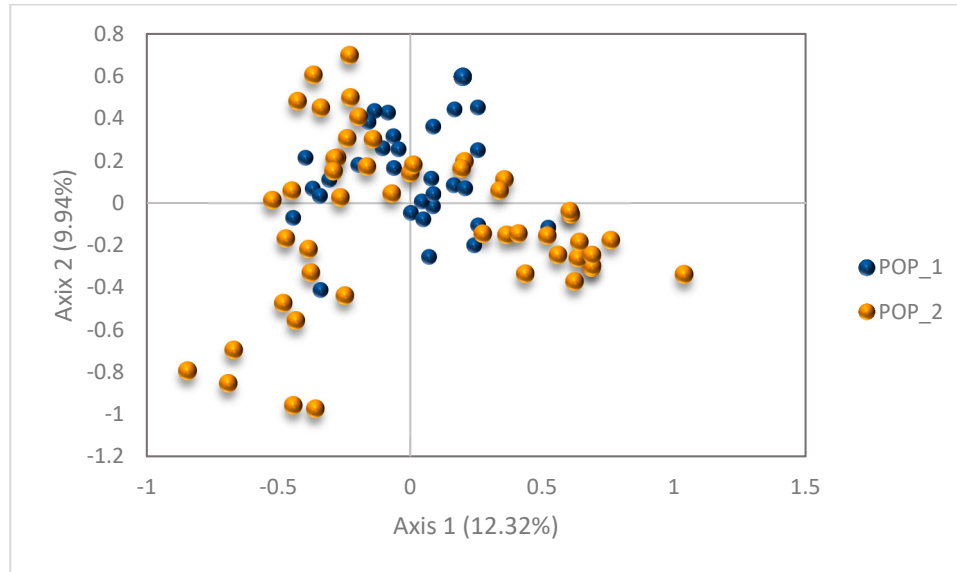

**Figure S3.** Results from the Bayesian analysis conducted in the POP\_1 and POP\_2. Following the Delta K procedure and looking at the Mean Likelihood curve, the best clusters were described at K=4 and K=5. No structure was found between POP\_1 and POP\_2 although the bar plot colors evidence different frequencies of the genetic components in the two groups.

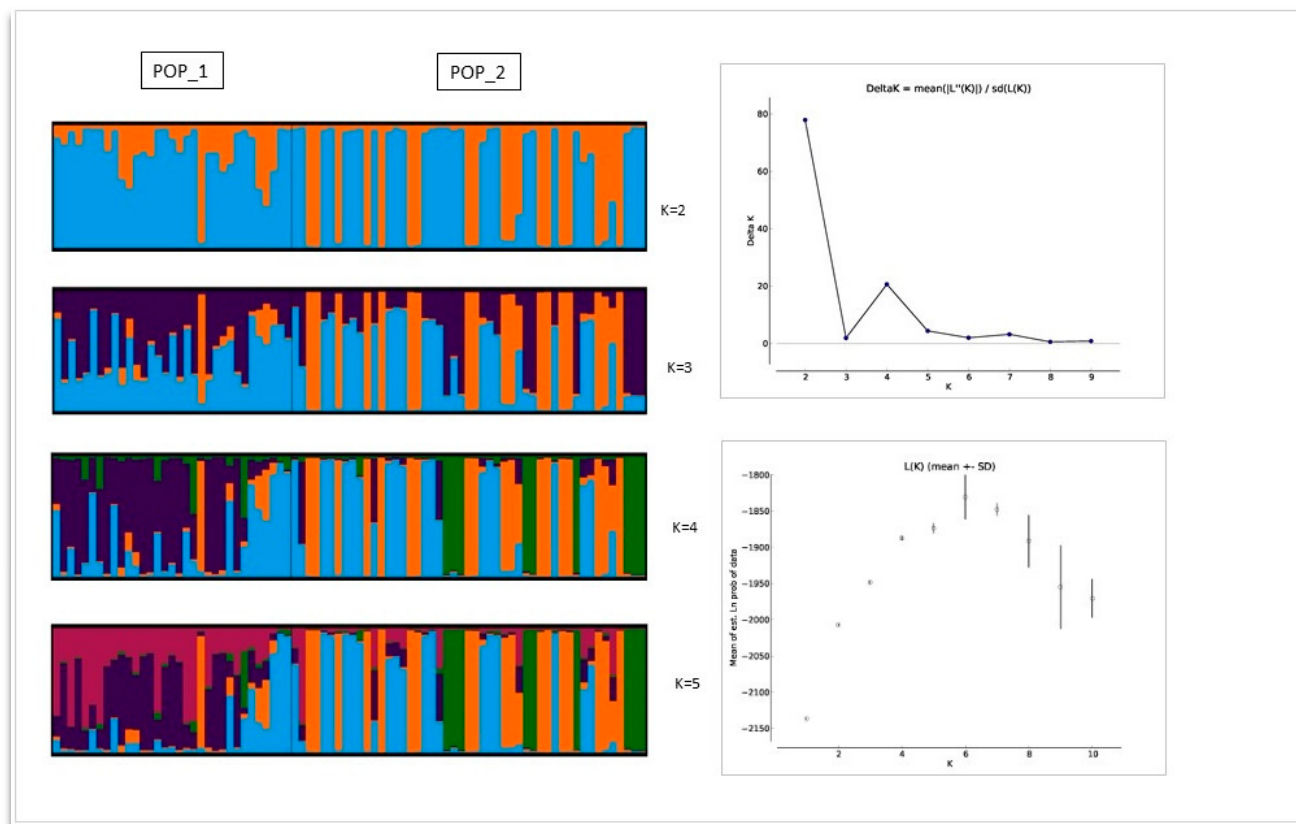

**Figure S4.** The plot of the Factorial Correspondence Analysis (FCA) of the comparison between the injured osprey individual from North Europe (POP\_N) and the samples included in POP\_1 and POP\_2. All the variance from Axis 1 was recorded between this individual and the other samples.

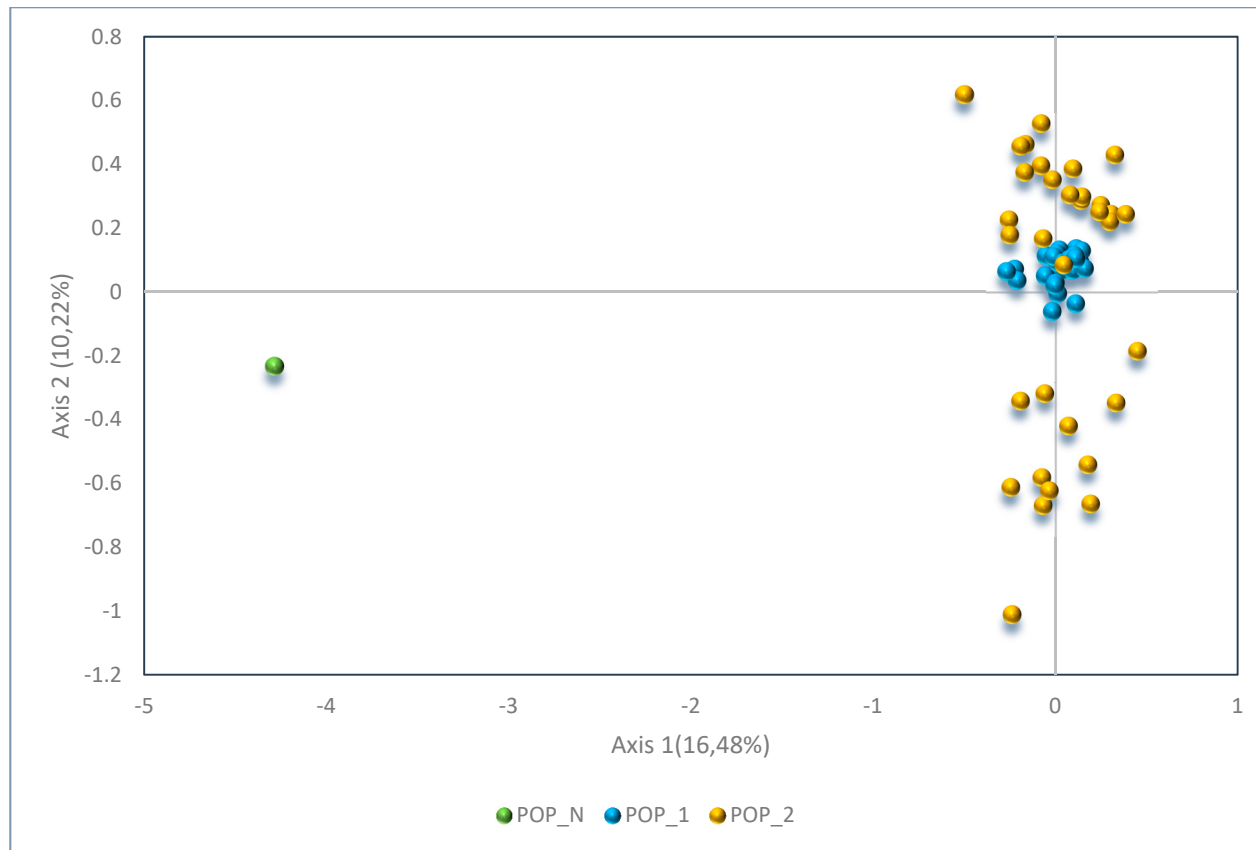

Supplement: s1 [file s1 › diversity-2287086-supplementary.pdf]
